# Supplementary material for: Using a limited mapping strategy to identify major QTLs for resistance to grapevine powdery mildew (Erysiphe necator) and their use in marker-assisted breeding
Source: PubMed Central journal article supplement — Theor Appl Genet. 2010 Dec 28;122(6):1059–73. doi: 10.1007/s00122-010-1511-6 (PMC3056998; doi:10.1007/s00122-010-1511-6), 2010-12-28

Supplemental Figure 1. Localization of the powdery mildew resistance locus from four populations on chromosome 18. Solid lines indicate the LOD scores and dashed lines indicate the % phenotypic variation explained by the locus. Only leaf scores were used for 08306 and 08391 populations (resistance from *V. romanetii* and *M. rotundifolia* cv. Trayshed, respectively). The 06708 and 06712 populations derive resistance from *M. rotundifolia* cv. Magnolia. All four tissue types from the 06712 population were scored for powdery mildew resistance. The VMC7f2 marker is linked to resistance in all studied populations.

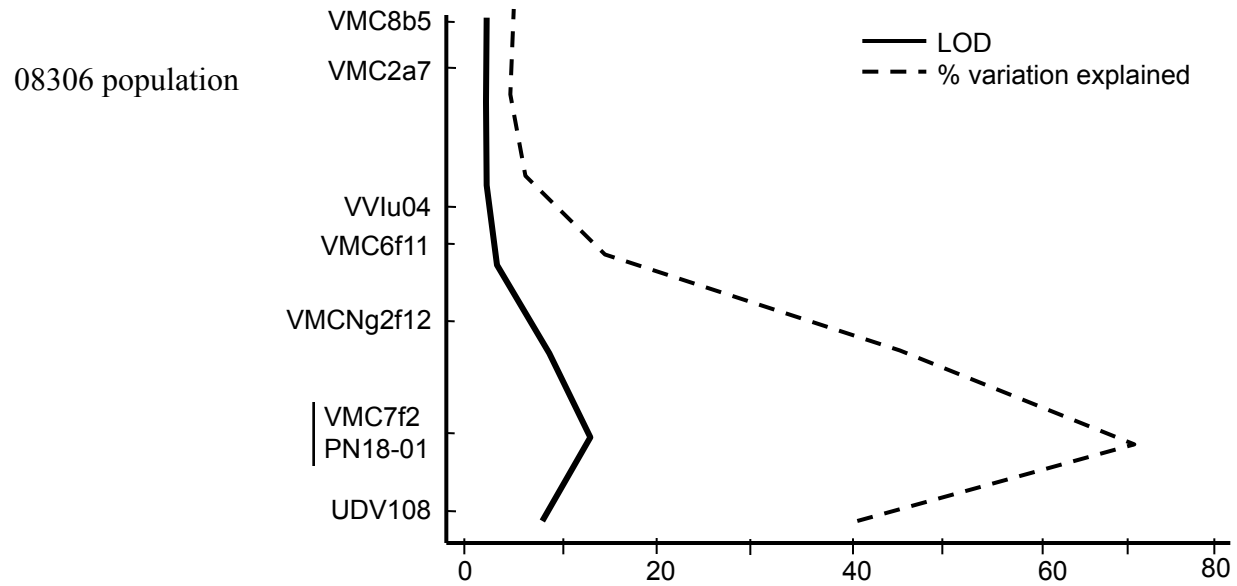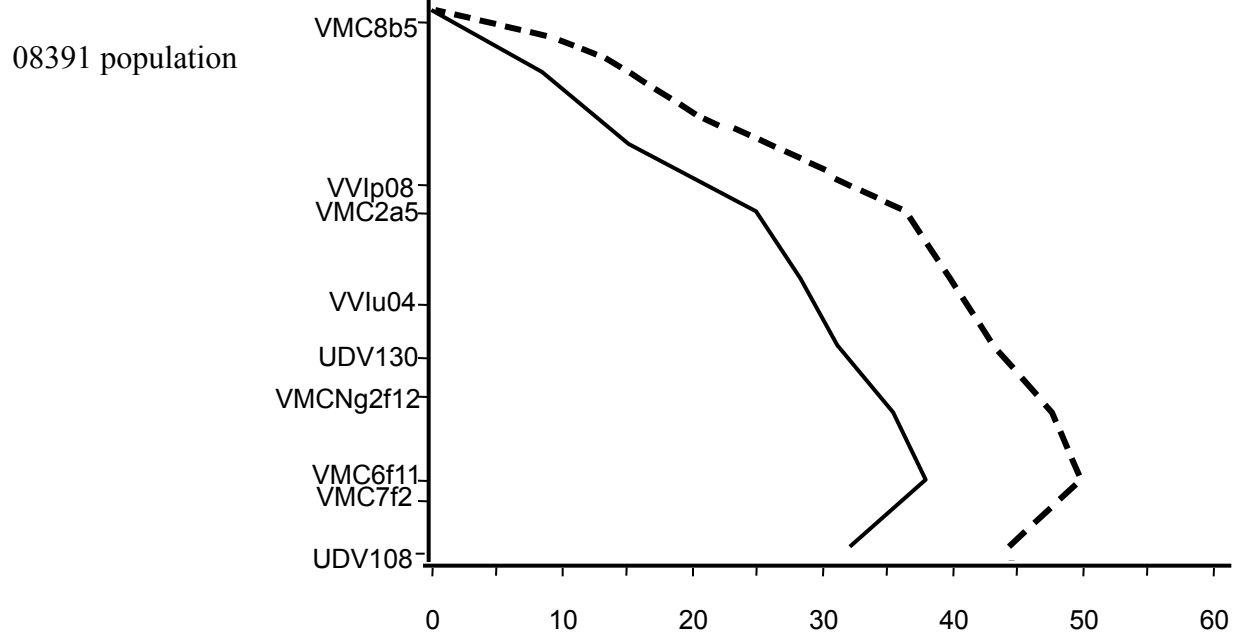

06708 population

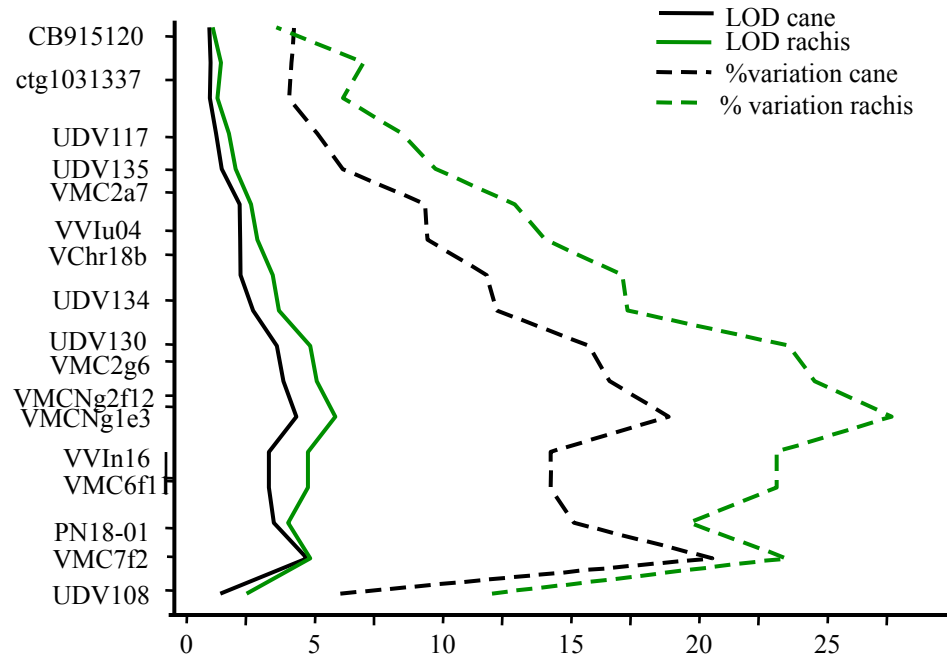

06712 population

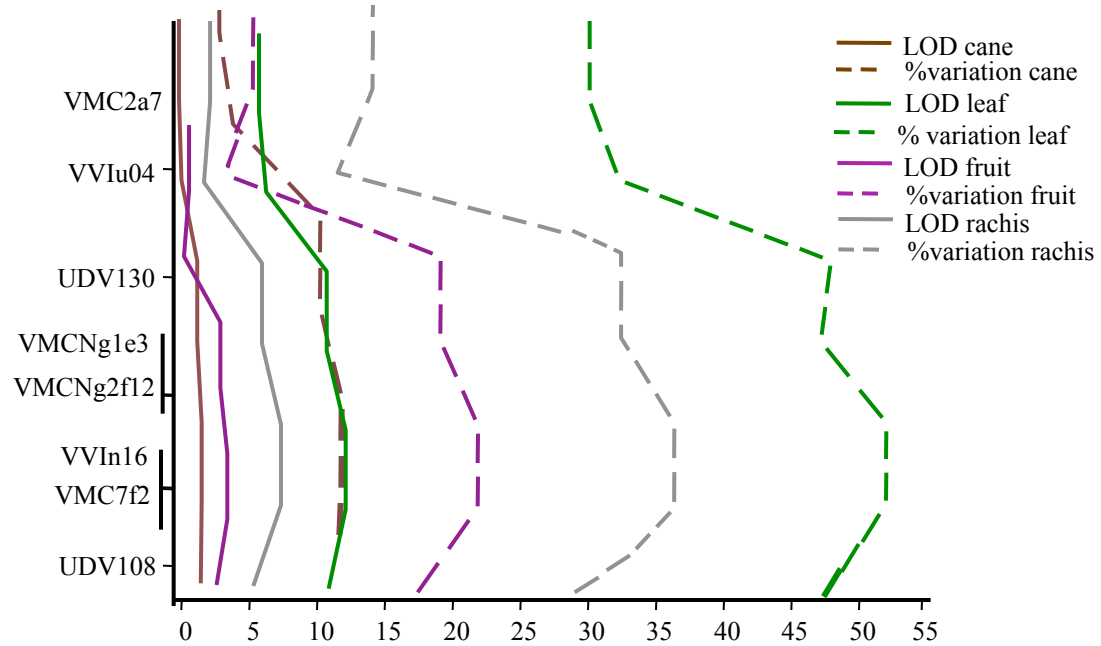

Supplement: 122_2010_1511_MOESM2_ESM.pdf [file 122_2010_1511_MOESM2_ESM.pdf]
